# Supplementary material for: Methodological aspects of design, analysis and reporting of studies with work participation as an outcome domain in patients with inflammatory arthritis: results of two systematic literature reviews informing EULAR points to consider
Source: PubMed Central journal article supplement — RMD Open. 2021 Feb 4;7(1):e001522. doi: 10.1136/rmdopen-2020-001522 (PMC7868290; doi:10.1136/rmdopen-2020-001522), 2021-02-04
Supplement: rmdopen-2020-001522supp001.pdf [file rmdopen-2020-001522supp001.pdf]

**Methodological aspects of design, analyses and reporting of studies with work participation as an outcome domain in patients with inflammatory arthritis: results of two systematic literature reviews informing EULAR points to consider**

**(Online Supplementary material)**

**Table of Content**

|                                                                                                                                                                                                                  | <b>Page</b> |
|------------------------------------------------------------------------------------------------------------------------------------------------------------------------------------------------------------------|-------------|
| Online Supplementary material                                                                                                                                                                                    |             |
| <b>Online Supplementary Figure S1:</b> Search strategies 1 and 2 according to the PICOT framework                                                                                                                | 2           |
| <b>Online Supplementary Text S1:</b> Exclusion criteria                                                                                                                                                          | 3           |
| <b>Online Supplementary Text S2:</b> Search strategy for studies with work participation as an outcome domain in patients with inflammatory arthritis                                                            | 4           |
| <b>Online Supplementary Text S3:</b> Search strategy for systematic literature reviews of studies with work participation as an outcome domain in patients with other chronic diseases                           | 12          |
| <b>Online Supplementary Figure S2:</b> Flowchart of the search for studies with work participation as an outcome domain in patients with inflammatory arthritis                                                  | 15          |
| <b>Online Supplementary Figure S3:</b> Flowchart of the search for systematic literature reviews of studies with work participation as an outcome domain in patients with other chronic diseases                 | 16          |
| <b>Online Supplementary Table S1.</b> Characteristics of included studies in inflammatory arthritis                                                                                                              | 17          |
| <b>Online Supplementary Table S2:</b> Included studies in inflammatory arthritis (Search 1) by the type of intervention and assessed work outcome domain                                                         | 19          |
| <b>Online Supplementary Table S3:</b> Included studies in inflammatory arthritis (Search 1) by frequency of assessment for each work outcome domain and by time horizon                                          | 20          |
| <b>Online Supplementary Table S4.</b> Characteristics of included systematic literature reviews of studies with work participation as an outcome domain in patients with other chronic diseases (Search 2, n=24) | 21          |
| <b>References</b>                                                                                                                                                                                                | 23          |

**Online Supplementary Figure S1: Search strategies 1 and 2 according to the PICOT framework**

|                      | Search 1                                                                                                                                                                                                                                                                                  | Search 2                |
|----------------------|-------------------------------------------------------------------------------------------------------------------------------------------------------------------------------------------------------------------------------------------------------------------------------------------|-------------------------|
| <b>P</b> opulation   | Rheumatoid arthritis<br>Axial Spondyloarthritis<br>Psoriatic arthritis<br>Juvenile idiopathic arthritis                                                                                                                                                                                   | Other chronic diseases* |
| <b>I</b> ntervention | <ul style="list-style-type: none"> <li>• Pharmacological intervention</li> <li>• Non-pharmacological intervention</li> <li>• No intervention (natural course of the disease)</li> </ul>                                                                                                   |                         |
| <b>C</b> omparator   | <ul style="list-style-type: none"> <li>• Any comparator</li> </ul>                                                                                                                                                                                                                        |                         |
| <b>O</b> utcome      | <ul style="list-style-type: none"> <li>• Work participation comprising:               <ul style="list-style-type: none"> <li>• <b>Paid work:</b> <i>work status</i> and if employed: <i>absenteeism &amp; presenteeism</i> (work productivity, work ability, etc.)</li> </ul> </li> </ul> |                         |
| <b>T</b> ime         | <ul style="list-style-type: none"> <li>• Any time of follow-up</li> </ul>                                                                                                                                                                                                                 |                         |

**Note:** studies in IA assessing costs of changes in work participation were identified and included in order to assess whether volumes of work productivity (e.g. days, hours) were reported. \*The most prevalent chronic diseases (i.e. Chronic obstructive pulmonary disease (COPD), Visual impairment and blindness, Cardiovascular diseases, Diabetes, Obesity and overweight, Deafness and hearing loss, Cancer, Oral health-related diseases, Alcohol dependency, Sickle-cell disease and other haemoglobin disorders) were included in accordance to the World Health Organization data provided in [https://www.who.int/topics/chronic\\_diseases/factsheets/en/](https://www.who.int/topics/chronic_diseases/factsheets/en/). For their relevance in relation to inflammatory arthritis also Inflammatory bowel diseases and Psoriasis were included.

**Online Supplementary Text S1: Exclusion criteria****Search 1:** Articles in inflammatory arthritis

- Target population: children (except Juvenile Idiopathic Arthritis followed in adulthood).
- Study designs: cross-sectional, retrospective, case-control, narrative reviews.
- Mixed populations: different rheumatic diseases (RMDs) not analysed separately.
- Publication year: < 2014 (for feasibility purposes and with the rationale that the most recent studies will likely be of better methodological quality and better reflect current standards)

**Search 2:** Systematic literature reviews in other chronic diseases

- Target population: articles on RMDs and articles on psychiatric illnesses.
- Publication year: < 2014 (for feasibility purposes and with the rationale that the most recent studies will likely be of better methodological quality and better reflect current standards)

**Online Supplementary Text S2: Search strategy for studies with work participation as an outcome domain in patients with inflammatory arthritis**

**MEDLINE (Ovid)**

Dates searched: 1946 to April 24, 2019

- 1 exp arthritis, rheumatoid/
- 2 ((rheumatoid or reumatoid or rheumat\$ or reumat\$) adj3 (arthrit\$ or artrit\$ or diseas\$ or condition\$ or nodule\$)).tw.
- 3 (felty\$ adj2 syndrome).tw.
- 4 (caplan\$ adj2 syndrome).tw.
- 5 psoriatic arthritis/
- 6 (psoria\$ adj (arthriti\$ or arthropath\$)).tw.
- 7 ((arthriti\$ or arthropath\$) adj psoria\$).tw.
- 8 oligoarthriti\$.tw.
- 9 exp Spondylitis/
- 10 (ankylos\$ or spondyl\$).tw.
- 11 SpA.tw.
- 12 (bekhterev\$ or bechterew\$).tw.
- 13 Arthritis, Juvenile Rheumatoid/
- 14 (juvenile\$ adj3 arthrit\$).tw.
- 15 jia.tw.
- 16 exp ARTHRITIS/
- 17 arthrit\$.tw.
- 18 (still\$ adj disease).tw.
- 19 Polyarthrit\$.tw.
- 20 or/16-19
- 21 exp Child/
- 22 Adolescent/
- 23 child\$.tw.
- 24 adolesc\$.tw.
- 25 juvenile\$.tw.
- 26 teenage\$.tw.

27 youth\$.tw.  
28 or/21-27  
29 20 and 28  
30 or/1-15,29  
31 exp Employment/  
32 Absenteeism/  
33 Presenteeism/  
34 Efficiency/  
35 (work adj3 (hours lost or return or loss or impair\$ or incapab\$ or incapacity or instability or perform\$ or unpaid or voluntary or own-use)).tw.  
36 (absent\$ or absence).tw.  
37 ((employment or job or time) adj3 (loss or lost or missed or stopped)).tw.  
38 presenteeism.tw.  
39 (PROWD or RA-WIS).tw.  
40 productivity.tw.  
41 sick leave.tw.  
42 unemploy\$.tw.  
43 (workplace or workday\$ or working week\$ or workweek\$).tw.  
44 or/31-43  
45 30 and 44  
46 randomized controlled trial.pt.  
47 controlled clinical trial.pt.  
48 randomized.ab.  
49 placebo.ab.  
50 drug therapy.fs.  
51 randomly.ab.  
52 trial.ab.  
53 groups.ab.  
54 or/46-53  
55 exp cohort studies/  
56 observational study.pt.  
57 (cohort\$ or prospective\$ or observational or longitudinal or follow-up).tw.

- 58 case-control studies/
- 59 case-control.tw.
- 60 or/54-59
- 61 (animals not (humans and animals)).sh.
- 62 60 not 61
- 63 45 and 62

### The Cochrane Library ([www.thecochranelibrary.com](http://www.thecochranelibrary.com))

Dates searched: April 26, 2019

- #1 MeSH descriptor: [Arthritis, Rheumatoid] explode all trees
- #2 ((rheumatoid or reumatoid or rheumat\* or reumat\*) near/3 (arthrit\* or artrit\* or diseas\* or condition\* or nodule\*)):ti,ab
- #3 (felty\* near/2 syndrome):ti,ab
- #4 (caplan\* near/2 syndrome):ti,ab
- #5 MeSH descriptor: [Arthritis, Psoriatic] this term only
- #6 (psoria\* NEXT (arthriti\* or arthropath\*)):TI,AB
- #7 ((arthriti\* or arthropath\*) NEXT psoria\*):ti,ab
- #8 oligoarthriti\*:ti,ab
- #9 MeSH descriptor: [Spondylitis] explode all trees
- #10 (ankylos\* or spondyl\*):ti,ab
- #11 spa:ti,ab
- #12 (bekhterev\* or bechterew\*):ti,ab
- #13 (juvenile\* NEAR/3 arthrit\*):ti,ab
- #14 jia:ti,ab
- #15 MeSH descriptor: [Arthritis] explode all trees
- #16 arthrit\*:ti,ab
- #17 (still\* NEXT disease):ti,ab
- #18 Polyarthrit\*:ti,ab
- #19 #15 OR #16 OR #17 OR #18
- #20 MeSH descriptor: [Child] explode all trees
- #21 MeSH descriptor: [Adolescent] this term only
- #22 child\*:ti,ab

- #23 adolesc\*:ti,ab
- #24 juvenile\*:ti,ab
- #25 teenage\*:ti,ab
- #26 youth\*:ti,ab
- #27 #20 OR #21 OR #22 OR #23 OR #24 OR #25 OR #26
- #28 #19 AND #27
- #29 #1 OR #2 OR #3 OR #4 OR #5 OR #6 OR #7 OR #8 OR #9 OR #10 OR #11 OR #12 OR #13 OR #14 OR #28
- #30 MeSH descriptor: [Employment] explode all trees
- #31 MeSH descriptor: [Absenteeism] this term only
- #32 MeSH descriptor: [Presenteeism] this term only
- #33 (work NEAR/3 ("hours lost" or return or loss or impair\* or incapab\* or incapacity or instability or perform\* or unpaid or voluntary or own-use)):ti,ab
- #34 (absent\* or absence):ti,ab
- #35 ((employment or job or time) NEAR/3 (loss or lost or missed or stopped)):ti,ab
- #36 presenteeism:ti,ab
- #37 (PROWD or RA-WIS):ti,ab
- #38 productivity:ti,ab
- #39 "sick leave":ti,ab
- #40 unemploy\*:ti,ab
- #41 (workplace or workday\* or "working week\*" or workweek\*):ti,ab
- #42 #30 OR #31 OR #32 OR #33 OR #34 OR #35 OR #36 OR #37 OR #38 OR #39 OR #40 OR #41
- #43 #29 AND #42

**EMBASE (Embase.com)**

Dates searched: 1980 to April 26, 2019

#60. #42 AND #58 AND ([article]/lim OR [article in press]/lim OR [review]/lim) AND [humans]/lim AND [embase]/lim

#59. #42 AND #58

#58. #43 OR #44 OR #45 OR #46 OR #47 OR #48 OR #49 OR #50 OR #51 OR #52 OR #53 OR #54 OR #55 OR #56 OR #57

#57. 'case control':ti,ab

#56. 'case control study'/exp

#55. cohort\*:ti,ab OR prospective\*:ti,ab OR observational:ti,ab OR longitudinal:ti,ab OR 'follow up':ti,ab

#54. 'observational study'/exp

#53. 'cohort analysis'/exp

#52. random\*:ab,ti

#51. 'randomized controlled trial'/exp

#50. trial:ti

#49. allocat\*:ab,ti

#48. (doubl\* NEAR/2 blind\*):ab,ti

#47. placebo\*:ab,ti

#46. crossover\*:ab,ti OR 'cross over\*':ab,ti

#45. 'single-blind procedure'

#44. 'double blind procedure'/de

#43. 'crossover procedure'/de

#42. #28 AND #41

#41. #29 OR #30 OR #31 OR #32 OR #33 OR #34 OR #35 OR #36 OR #37 OR #38 OR #39 OR #40

#40. workplace:ti,ab OR workday\*:ti,ab OR 'working week\*':ti,ab OR workweek\*:ti,ab

#39. unemploy\*:ti,ab

#38. 'sick leave':ti,ab

#37. productivity:ti,ab

#36. prowd:ti,ab OR 'ra wis':ti,ab

#35. presenteeism:ti,ab

#34. ((employment OR job OR time) NEAR/3 (loss OR lost OR missed OR stopped)):ti,ab

#33. absent\*:ti,ab OR absence:ti,ab

#32. (work NEAR/3 ('hours lost' OR return OR loss OR impair\* OR incapab\* OR incapacity OR instability OR perform\* OR unpaid OR voluntary OR 'own use')):ti,ab

#31. 'presenteeism'/de

#30. 'absenteeism'/de

#29. 'employment'/exp

#28. #1 OR #2 OR #3 OR #4 OR #5 OR #6 OR #7 OR #8 OR #9 OR #10 OR #11 OR #12 OR #13 OR #14 OR #27

#27. #19 AND #26

#26. #20 OR #21 OR #22 OR #23 OR #24 OR #25



- #25. youth\*:ti,ab
- #24. teenage\*:ti,ab
- #23. juvenile\*:ti,ab
- #22. adolesc\*:ti,ab
- #21. child\*:ti,ab
- #20. 'adolescent'/exp
- #19. #15 OR #16 OR #17 OR #18
- #18. polyarthrit\*:ti,ab
- #17. still\*:ti,ab AND next:ti,ab AND disease:ti,ab
- #16. arthrit\*:ti,ab
- #15. 'arthritis'/exp
- #14. jia:ti,ab
- #13. (juvenile\* NEAR/3 arthrit\*):ti,ab
- #12. bekhterev\*:ti,ab OR bechterew\*:ti,ab
- #11. spa:ti,ab
- #10. ankylos\*:ti,ab OR spondyl\*:ti,ab
- #9. 'spondylitis'/exp
- #8. oligoarthriti\*:ab,ti
- #7. ((arthriti\* OR arthropath\*) NEAR/2 psoria\*):ti,ab
- #6. (psoria\* NEAR/2 (arthriti\* OR arthropath\*)):ab,ti
- #5. 'psoriatic arthritis'/de
- #4. (caplan\* NEAR/2 syndrome):ab,ti
- #3. (felty\* NEAR/2 syndrome):ab,ti
- #2. ((rheumatoid OR reumatoid OR reumat\* OR reumat\*) NEAR/3 (arthrit\* OR artrit\* OR diseas\* OR condition\* OR nodule\*)):ab,ti
- #1. 'rheumatoid arthritis'/exp

**CINAHL (EBSCOhost)**

Dates searched: 1982 to April 2019

S1 (MH "Arthritis, Rheumatoid+")

S2 TI ( ((rheumatoid OR reumatoid OR rheumat\* OR reumat\*) N3 (arthrit\* OR artrit\* OR diseas\* OR condition\* OR nodule\* ) ) OR AB ( ((rheumatoid OR reumatoid OR rheumat\* OR reumat\*) N3 (arthrit\* OR artrit\* OR diseas\* OR condition\* OR nodule\* ) )

S3 TI felty\* N2 syndrome OR AB felty\* N2 syndrome

S4 TI caplan\* N2 syndrome OR AB caplan\* N2 syndrome

S5 (MH "Arthritis, Psoriatic")

S6 TI ( psoria\* NEXT (arthriti\* OR arthropath\* ) ) OR AB ( psoria\* NEXT (arthriti\* OR arthropath\* ) )

S7 TI ( (arthriti\* OR arthropath\* ) NEXT psoria\* ) OR AB ( (arthriti\* OR arthropath\* ) NEXT psoria\* )

S8 TI oligoarthriti\* OR AB oligoarthriti\*

S9 (MH "Spondylitis, Ankylosing")

S10 TI ( ankylos\* OR spondyl\* ) OR AB ( ankylos\* OR spondyl\* )

S11 TI spa OR AB spa

S12 TI ( bekhterev\* OR bechterew\* ) OR AB ( bekhterev\* OR bechterew\* )

S13 TI juvenile\* N3 arthrit\* OR AB juvenile\* N3 arthrit\*

S14 TI jia OR AB jia

S15 (MH "Arthritis+")

S16 TI arthrit\* OR AB arthrit\*

S17 TI still\* NEXT disease OR AB still\* NEXT disease

S18 TI Polyarthrit\* OR AB Polyarthrit\*

S19 S15 OR S16 OR S17 OR S18

S20 (MH "Child+")

S21 (MH "Adolescence+")

S22 TI child\* OR AB child\*

S23 TI adolesc\* OR AB adolesc\*

S24 TI juvenile\* OR AB juvenile\*

S25 TI teenage\* OR AB teenage\*

S26 TI youth\* OR AB youth\*

S27 S20 OR S21 OR S22 OR S23 OR S24 OR S25 OR S26

S28 S19 AND S27

S29 S1 OR S2 OR S3 OR S4 OR S5 OR S6 OR S7 OR S8 OR S9 OR S10 OR S11 OR S12 OR S13 OR S14 OR S28

S30 (MH "Employment+")

S31 (MH "Absenteeism")

S32 (MH "Presenteeism")

S33 TI ( (work N3 ("hours lost" OR return OR loss OR impair\* OR incapab\* OR incapacity OR instability OR perform\* OR unpaid OR voluntary OR own-use)) ) OR AB ( (work N3 ("hours lost" OR return OR loss OR impair\* OR incapab\* OR incapacity OR instability OR perform\* OR unpaid OR voluntary OR own-use)) )

S34 TI ( absent\* or absence ) OR AB ( absent\* or absence )

S35 TI ( ((employment or job or time) N3 (loss or lost or missed or stopped)) ) OR AB ( ((employment or job or time) N3 (loss or lost or missed or stopped)) )

S36 TI presenteeism OR AB presenteeism

S37 TI ( PROWD or RA-WIS ) OR AB ( PROWD or RA-WIS )

S38 TI productivity OR AB productivity

S39 TI "sick leave" OR AB "sick leave"

S40 TI unemploy\* OR AB unemploy\*

S41 TI ( workplace OR workday\* OR "working week\*" OR workweek\* ) OR AB ( workplace OR workday\* OR "working week\*" OR workweek\* )

S42 S30 OR S31 OR S32 OR S33 OR S34 OR S35 OR S36 OR S37 OR S38 OR S39 OR S40 OR S41

S42 S29 AND S42

S43 S29 AND S42 Limiters - Randomized Controlled Trials

S44 (MH "Nonexperimental Studies+")

S45 TI ( cohort\* OR prospective\* OR observational OR longitudinal OR follow-up OR case-control) OR AB ( cohort\* OR prospective\* OR observational OR longitudinal OR follow-up OR case-control)

S46 S44 OR S45

S47 S43 AND S46

S48 S43 OR S47

**Online Supplementary Text S3: Search strategy for systematic literature reviews of studies with work participation as an outcome domain in patients with other chronic diseases**

Database: Ovid MEDLINE(R) and Epub Ahead of Print, In-Process & Other Non-Indexed Citations, Daily and Versions(R) <1946 to May 03, 2019>

Search Strategy:

- 
- 1 exp Employment/
  - 2 Absenteeism/
  - 3 Presenteeism/
  - 4 Efficiency/
  - 5 ((work or house\$) adj3 (hours lost or return or loss or impair\$ or incapab\$ or incapacity or instability or perform\$ or unpaid or voluntary or own-use)).tw.
  - 6 (absent\$ or absence).tw.
  - 7 ((employment or job or time) adj3 (loss or lost or missed or stopped)).tw.
  - 8 presenteeism.tw.
  - 9 (PROWD or RA-WIS).tw.
  - 10 productivity.tw.
  - 11 sick leave.tw.
  - 12 unemploy\$.tw.
  - 13 (workplace or workday\$ or working week\$ or workweek\$).tw.
  - 14 child care/
  - 15 (child\$ adj3 (care\$ or caring)).tw.
  - 16 or/1-15
  - 17 exp Chronic Disease/
  - 18 (chronic adj2 (condition\$ or illness\$ or disease\$ or disorder\$)).tw.
  - 19 (multimorbid\$ or mcc).tw.
  - 20 Alzheimer Disease/
  - 21 Alzheimer\$.tw.
  - 22 exp Arthritis/
  - 23 arthrit\$.tw.
  - 24 exp Asthma/
  - 25 asthma\$.tw.

- 26 exp Neoplasms/  
27 cancer\$.tw.  
28 neoplasm\$.tw.  
29 carcinoma\$.tw.  
30 lymphoma\$.tw.  
31 (leukaemia or leukemia).tw.  
32 exp Diabetes Mellitus/  
33 (diabet\$ or prediabet\$).tw.  
34 exp Epilepsy/  
35 Epilep\$.tw.  
36 exp Cardiovascular Diseases/  
37 (cardiovasc\$ or cvd).tw.  
38 exp Heart Diseases/  
39 ((heart or cardiac or coronary or myocardial) adj2 (disease\$ or condition\$)).tw.  
40 exp Hypertension/  
41 (hypertens\$ or high blood pressure).tw.  
42 exp Stroke/  
43 (stroke\$ or cerebrovascular).tw.  
44 exp Inflammatory Bowel Diseases/  
45 (Inflammatory Bowel disease\$ or ibd).tw.  
46 (crohn\$ or ulcerative colitis).tw.  
47 exp Lupus Erythematosus, Systemic/  
48 (lupus or sle).tw.  
49 exp Overweight/  
50 (obes\$ or overweight).tw.  
51 Oral Health/  
52 exp Dental Caries/  
53 (oral health or tooth decay or dental caries).tw.  
54 exp Pulmonary Disease, Chronic Obstructive/  
55 (Chronic Obstructive Pulmonary Disease or copd).tw.  
56 exp Vision Disorders/

57 ((vision or visual\$) adj3 (disorder\$ or impair\$)).tw.  
58 (blind or blindness).tw.  
59 exp Hearing Loss/  
60 (hearing adj3 (disorder\$ or loss)).tw.  
61 deaf\$.tw.  
62 exp Alcohol-Related Disorders/  
63 alcohol\$.tw.  
64 exp Anemia, Sickle Cell/  
65 (sickle cell adj (disease or an?emia)).tw.  
66 exp Psoriasis/  
67 (psoriasis or Psoriatic).tw.  
68 or/17-67  
69 Meta-Analysis.pt.  
70 systematic review.pt.  
71 meta-analysis.sh.  
72 (meta-analys\$ or meta analys\$ or metaanalys\$).tw,sh.  
73 (systematic\$ adj5 review\$).tw,sh.  
74 (systematic\$ adj5 overview\$).tw,sh.  
75 (quantitativ\$ adj5 review\$).tw,sh.  
76 (quantitativ\$ adj5 overview\$).tw,sh.  
77 (quantitativ\$ adj5 synthesis\$).tw,sh.  
78 (methodologic\$ adj5 review\$).tw,sh.  
79 (methodologic\$ adj5 overview\$).tw,sh.  
80 (integrative research review\$ or research integration).tw.  
81 or/69-80  
82 and/16,68,81  
83 limit 82 to yr="2009 -Current"

**Online Supplementary Figure S2: Flowchart of the search for studies with work participation as an outcome domain in patients with inflammatory arthritis**

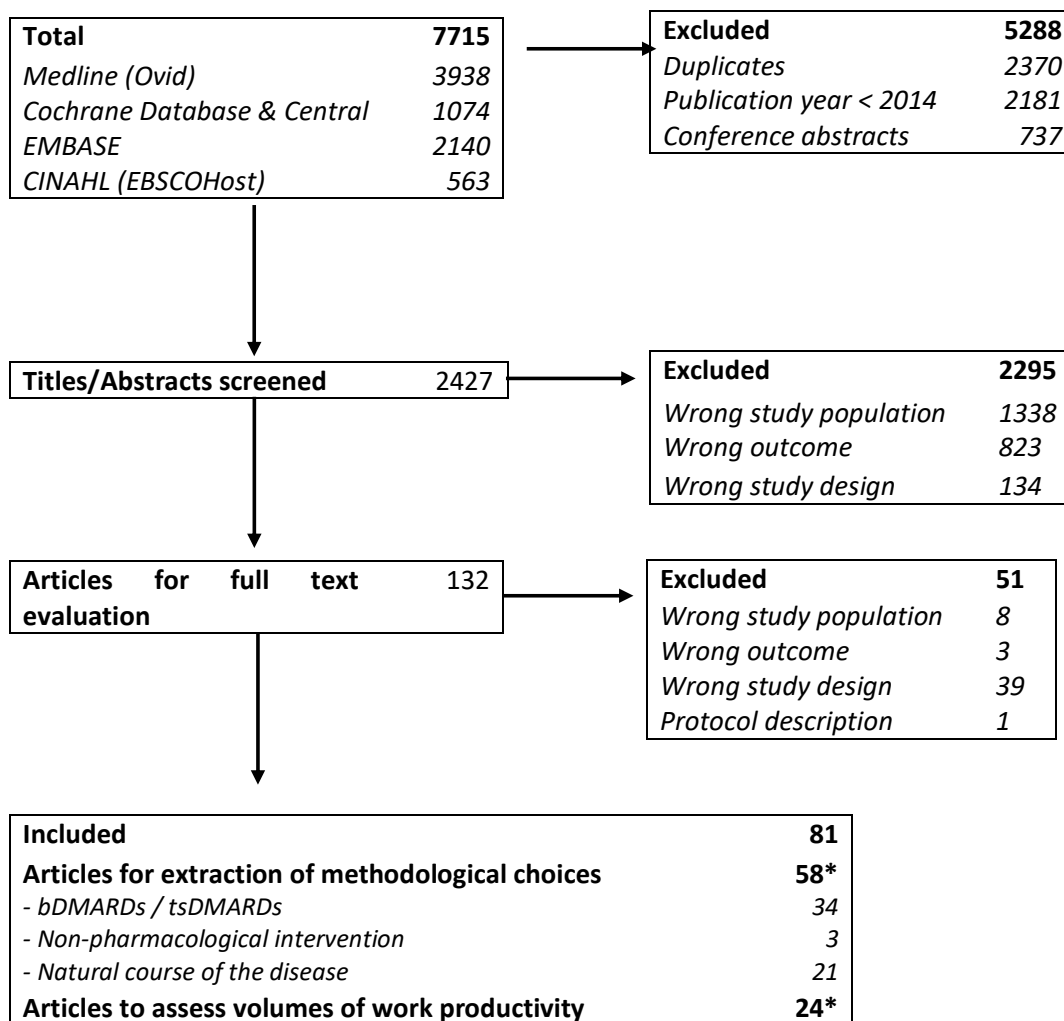

\*Alemao et al.<sup>1</sup> provided information on methodological choices regarding the assessment of sick leave and also on volumes of work productivity.

**Online Supplementary Figure S3:** Flowchart of the search for systematic literature reviews of studies with work participation as an outcome domain in patients with other chronic diseases

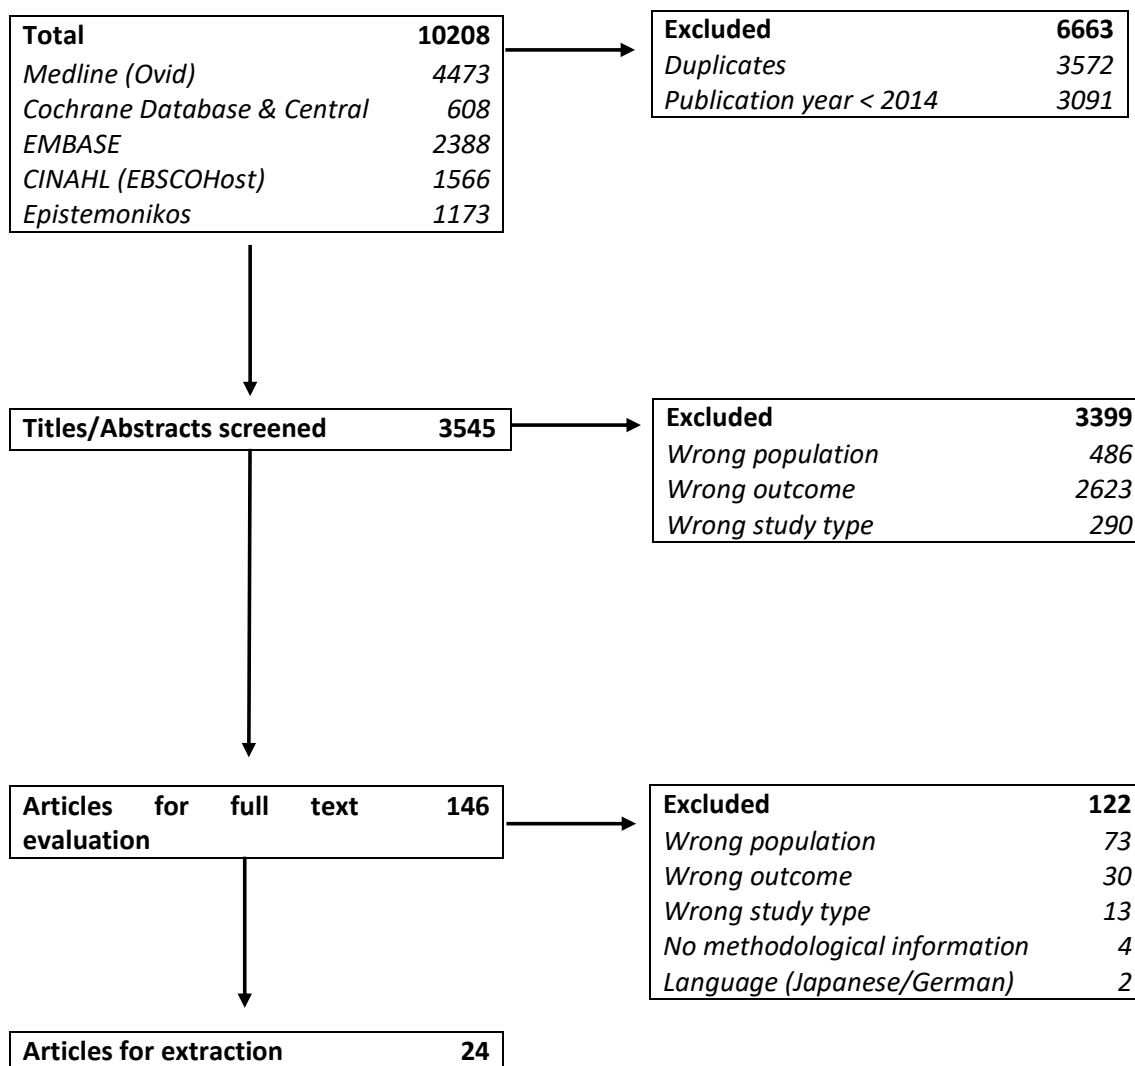



**Online Supplementary Table S1.** Characteristics of included studies in inflammatory arthritis

| Author, Year <sup>Ref</sup>          | Disease    | Study design | Intervention                     | Primary outcome | Outcome assessed | Outcome measurement instrument                    |
|--------------------------------------|------------|--------------|----------------------------------|-----------------|------------------|---------------------------------------------------|
| Alemao E, 2018 <sup>1</sup>          | RA         | OBS          | natural course of the disease    | yes             | WS, SL           | number of workdays lost in the past year          |
| Barnabe C, 2015 <sup>2</sup>         | RA         | OBS          | natural course of the disease    | yes             | P                | VR-12                                             |
| Bingham CO, 2014 <sup>3</sup>        | RA         | RCT          | bDMARD                           | no              | P                | VAS 10cm                                          |
| Boer AC, 2018 <sup>4</sup>           | RA         | OBS          | natural course of the disease    | no              | SL, P            | WPAI-RA & WPS-RA                                  |
| Boonen A, 2018 <sup>5</sup>          | axSpA      | OBS          | bDMARD                           | yes             | WS, SL, P        | WPAI-AS                                           |
| Boot C, 2018 <sup>6</sup>            | RA         | OBS          | natural course of the disease    | yes             | P                | WLQ-25 PDmod                                      |
| Castillo-Ortiz JD, 2016 <sup>7</sup> | axSpA      | OBS          | natural course of the disease    | no              | WS               | study-specific questionnaire                      |
| Claudepierre P, 2019 <sup>8</sup>    | axSpA      | OBS          | bDMARD                           | yes             | SL, P            | WPAI-AS                                           |
| Combe B, 2015 <sup>9</sup>           | RA         | OBS          | natural course of the disease    | no              | SL               | study-specific questionnaire                      |
| Cooksey R, 2015 <sup>10</sup>        | axSpA      | OBS          | natural course of the disease    | no              | SL, P            | WPAI-AS                                           |
| Deodhar AA, 2016 <sup>11</sup>       | axSpA      | RCT          | bDMARD                           | no              | SL, P            | WPAI-GH                                           |
| Dougados M, 2015 <sup>12</sup>       | axSpA      | RCT          | bDMARD                           | no              | SL, P            | WPAI-AS                                           |
| Druce K, 2018 <sup>13</sup>          | RA, axSpA  | OBS          | natural course of the disease    | no              | SL, P            | WPAI-SHP                                          |
| Emery P, 2016 <sup>14</sup>          | RA         | RCT          | bDMARD                           | yes             | WS, SL, P        | WPAI-RA                                           |
| Eriksson JK, 2016 <sup>15</sup>      | RA         | RCT          | bDMARD                           | no              | SL               | study-specific questionnaire                      |
| Espersen R, 2015 <sup>16</sup>       | RA         | Registry     | natural course of the disease    | yes             | WS               | disability pension                                |
| Fleischmann R, 2016 <sup>17</sup>    | RA         | RCT          | bDMARD                           | no              | SL, P            | WPAI-RA                                           |
| Gottlieb AB, 2018 <sup>18</sup>      | PsA        | RCT          | bDMARD                           | no              | SL, P            | WPAI-SHP                                          |
| Haglund E, 2015 <sup>19</sup>        | axSpA, PsA | OBS          | natural course of the disease    | yes             | SL, P            | WPAI-AS                                           |
| Hansen SM, 2016 <sup>20</sup>        | RA         | Registry     | natural course of the disease    | yes             | SL               | long-term sickness absence                        |
| Hansen SM, 2017 <sup>21</sup>        | RA         | Registry     | natural course of the disease    | yes             | WS, SL           | long-term sickness absence and disability pension |
| He C, 2016 <sup>22</sup>             | axSpA      | OBS          | non-pharmacological intervention | yes             | WS, P            | study-specific questionnaire                      |
| Hussain W, 2015 <sup>23</sup>        | RA         | OBS          | bDMARD                           | yes             | SL, P            | WPAI-GH                                           |
| Kaeley GS, 2018 <sup>24</sup>        | RA         | RCT          | bDMARD                           | no              | SL, P            | WPAI-RA                                           |
| Karpouzas GA, 2017 <sup>25</sup>     | RA         | OBS          | natural course of the disease    | no              | SL, P            | WPAI-GH                                           |
| Karpouzas GA, 2018 <sup>26</sup>     | RA         | OBS          | natural course of the disease    | no              | SL, P            | WPAI-GH                                           |
| Kavanaugh A, 2015 <sup>27</sup>      | PsA        | RCT          | bDMARD                           | no              | SL, P            | WPS-PsA                                           |
| Keystone EC, 2017 <sup>28</sup>      | RA         | RCT          | tsDMARD                          | no              | WS, SL, P        | WPAI-RA                                           |
| Machado DA, 2014 <sup>29</sup>       | RA         | RCT          | bDMARD                           | no              | SL, P            | WPAI-RA                                           |
| Maksymowuch WP, 2016 <sup>30</sup>   | axSpA      | RCT          | bDMARD                           | no              | SL, P            | WPAI-GH                                           |
| Manders SH, 2014 <sup>31</sup>       | RA         | OBS          | bDMARD                           | no              | WS               | study-specific questionnaire                      |
| McWilliams DF, 2014 <sup>32</sup>    | RA         | OBS          | natural course of the disease    | yes             | WS               | study-specific questionnaire                      |

| Author, Year <sup>Ref</sup>            | Disease   | Study design | Intervention                     | Primary outcome | Outcome assessed | Outcome measurement instrument                                                                |
|----------------------------------------|-----------|--------------|----------------------------------|-----------------|------------------|-----------------------------------------------------------------------------------------------|
| Muñoz-Fernández S, 2016 <sup>33</sup>  | RA, axSpA | OBS          | non-pharmacological intervention | yes             | WS, SL, P        | WPAI-GH                                                                                       |
| Nakagawa J, 2019 <sup>34</sup>         | PsA       | OBS          | bDMARD                           | yes             | SL, P            | WPAI-PsA                                                                                      |
| Olofsson T, 2014 <sup>35</sup>         | RA        | Registry     | natural course of the disease    | yes             | WS, SL           | days of sick leave over a month                                                               |
| Olofsson T, 2016 <sup>36</sup>         | RA        | Registry     | natural course of the disease    | yes             | SL               | days of sick leave over a month                                                               |
| Olofsson T, 2017 <sup>37</sup>         | RA        | Registry     | bDMARD                           | yes             | SL               | days of sick leave over a month                                                               |
| Olofsson T, 2018 <sup>38</sup>         | RA        | Registry     | natural course of the disease    | yes             | SL               | days of sick leave over a month                                                               |
| Rahman P, 2016 <sup>39</sup>           | PsA       | RCT          | bDMARD                           | no              | P                | VAS 10 cm                                                                                     |
| Rendas-Baum R, 2017 <sup>40</sup>      | RA        | RCT          | tsDMARD                          | no              | SL, P            | study-specific questionnaire                                                                  |
| Shim J, 2018 <sup>41</sup>             | axSpA     | OBS          | bDMARD                           | no              | WS, SL, P        | WPAI-SHP                                                                                      |
| Smolen JS, 2017 <sup>42</sup>          | RA        | RCT          | tsDMARD                          | no              | WS, SL, P        | WPAI-RA                                                                                       |
| Strand V, 2015 <sup>43</sup>           | RA        | RCT          | bDMARD                           | no              | WS, SL, P        | WPAI-RA                                                                                       |
| Strand V, 2018 <sup>44</sup>           | RA        | RCT          | bDMARD                           | no              | SL, P            | WPS-RA                                                                                        |
| Szántó S, 2016 <sup>45</sup>           | PsA       | OBS          | bDMARD                           | no              | SL, P            | WPAI-SHP                                                                                      |
| Takeuchi T, 2017 <sup>46</sup>         | RA        | OBS          | bDMARD                           | yes             | SL, P            | WPAI-RA                                                                                       |
| Tiipana-Kinnunen T, 2014 <sup>47</sup> | RA        | OBS          | natural course of the disease    | yes             | WS               | study-specific questionnaire                                                                  |
| Tillett W, 2017 <sup>48</sup>          | PsA       | OBS          | bDMARD                           | yes             | SL, P            | WPAI-SHP                                                                                      |
| Tran-Duy A, 2015 <sup>49</sup>         | axSpA     | OBS          | bDMARD                           | no              | SL, P            | VAS 10 cm                                                                                     |
| van der Heijde D, 2014 <sup>50</sup>   | axSpA     | RCT          | bDMARD                           | no              | WS, P            | VAS 10 cm                                                                                     |
| van der Heijde D, 2018 <sup>51</sup>   | axSpA     | RCT          | bDMARD                           | no              | SL, P            | WPS-AS                                                                                        |
| Van Lunteren M, 2017 <sup>52</sup>     | axSpA     | OBS          | natural course of the disease    | yes             | SL, P            | WPAI-AS                                                                                       |
| Van Vilsteren M, 2017 <sup>53</sup>    | RA        | RCT          | non-pharmacological intervention | yes             | P                | WLQ-25 PDmod                                                                                  |
| Wallman JK, 2017 <sup>54</sup>         | axSpA     | OBS          | bDMARD                           | no              | SL               | work-loss days (insurance registry records) 360 days before and 720 after anti-TNF initiation |
| Webers C, 2018 <sup>55</sup>           | axSpA     | OBS          | natural course of the disease    | yes             | SL               | study-specific questionnaire                                                                  |
| Wei JC, 2018 <sup>56</sup>             | axSpA     | RCT          | bDMARD                           | no              | SL, P            | WPAI-SHP                                                                                      |
| Westhovens R, 2018 <sup>57</sup>       | RA        | OBS          | bDMARD                           | yes             | SL, P            | WPS-RA                                                                                        |
| Wiland P, 2016 <sup>58</sup>           | RA        | RCT          | bDMARD                           | no              | SL, P            | WPAI-RA                                                                                       |

**axSpA** – Axial Spondyloarthritis; **AS** – ankylosing spondylitis; **bDMARD** – biologic disease modifying anti-rheumatic drugs; **GH** – general health; **OBS** – Observational studies; **P** – presenteeism; **PsA** – Psoriatic Arthritis; **RA** – Rheumatoid Arthritis; **RCT** – randomized controlled trials; **SL** – sick leave; **VAS** – visual analogic scale; **VR-12** - The Veteran's RAND 12 Item Health Survey; **SHP** - Specific Health Problem; **tsDMARD** – targeted synthetic disease modifying anti-rheumatic drugs; **WLQ-25** – Work Limitations Questionnaire 25-item; **WPAI** – work productivity and activity impairment; **WPS** – work productivity questionnaire; **WS** – work status.

**Online Supplementary Table S2 – Included studies in inflammatory arthritis (Search 1) by the type of intervention and assessed work outcome domain**

|                                                   | <b>Total (n=58)</b> | <b>RCT (n=22)</b>                                                                  | <b>OBS (n=36)</b>                                                                         |
|---------------------------------------------------|---------------------|------------------------------------------------------------------------------------|-------------------------------------------------------------------------------------------|
|                                                   | <b>n (%)</b>        | <b>n (%)</b>                                                                       | <b>n (%)</b>                                                                              |
| <b>Type of intervention</b>                       |                     |                                                                                    |                                                                                           |
| Pharmacological intervention                      | <b>34 (59)</b>      | <b>21 (95)</b> <sup>3,11,12,14,15,17,18,24,27–30,39,40,42–44,50,51,56,58</sup>     | <b>13 (36)</b> <sup>5,8,23,31,34,37,41,45,46,48,49,54,57</sup>                            |
| Non-pharmacological intervention                  | <b>3 (5)</b>        | <b>1 (5)</b> <sup>53</sup>                                                         | <b>2 (6)</b> <sup>22,33</sup>                                                             |
| Natural course of the disease                     | <b>21 (36)</b>      | <b>0 (0)</b>                                                                       | <b>21 (58)</b> <sup>1,2,4,6,7,9,10,13,16,19–21,25,26,32,35,36,38,47,52,55</sup>           |
| <b>Work outcome domains assessed</b>              |                     |                                                                                    |                                                                                           |
| Work is assessed as a primary outcome             | <b>26 (45)</b>      | <b>2 (9)</b> <sup>14,53</sup>                                                      | <b>24 (67)</b> <sup>1,2,5,6,8,16,19–23,32–38,46–48,52,55,57</sup>                         |
| Work status (only)                                | <b>5 (9)</b>        | <b>0 (0)</b>                                                                       | <b>6 (17)</b> <sup>7,16,22,31,32,47</sup>                                                 |
| Sick leave (only)                                 | <b>9 (16)</b>       | <b>2 (9)</b> <sup>15,40</sup>                                                      | <b>7 (19)</b> <sup>9,20,36–38,54,55</sup>                                                 |
| Presenteeism (only)                               | <b>5 (9)</b>        | <b>3 (14)</b> <sup>3,39,53</sup>                                                   | <b>2 (6)</b> <sup>2,6</sup>                                                               |
| Both sick leave and presenteeism (no work status) | <b>27 (47)</b>      | <b>12 (55)</b> <sup>11,12,17,18,24,27,29,30,44,51,56,58</sup>                      | <b>15 (42)</b> <sup>4,8,10,13,19,23,25,26,34,45,46,48,49,52,57</sup>                      |
| Both work status and sick leave (no presenteeism) | <b>3 (5)</b>        | <b>0 (0)</b>                                                                       | <b>3 (8)</b> <sup>1,21,35</sup>                                                           |
| Both work status and presenteeism (no sick leave) | <b>1 (2)</b>        | <b>1 (5)</b> <sup>50</sup>                                                         | <b>0 (0)</b>                                                                              |
| Work status and sick leave and presenteeism       | <b>7 (12)</b>       | <b>4 (18)</b> <sup>14,28,42,43</sup>                                               | <b>3 (8)</b> <sup>5,33,41</sup>                                                           |
| Sick leave and/or presenteeism                    | <b>52 (90)</b>      | <b>22 (100)</b> <sup>3,11,12,14,15,17,18,24,27–30,39,40,42–44,50,51,53,56,58</sup> | <b>30 (83)</b> <sup>1,2,4–6,8–10,13,19–21,23,25,26,33–38,41,45,46,48,49,52,54,55,57</sup> |
| Work status (any*)                                | <b>17 (29)</b>      | <b>5 (23)</b> <sup>14,28,42,43,50</sup>                                            | <b>12 (33)</b> <sup>1,5,7,16,21,22,31–33,35,41,47</sup>                                   |
| Sick leave (any*)                                 | <b>46 (79)</b>      | <b>18 (82)</b> <sup>11,12,14,15,17,18,24,27–30,40,42–44,51,56,58</sup>             | <b>28 (78)</b> <sup>1,4,5,8–10,13,19–21,23,25,26,33–38,41,45,46,48,49,52,54,55,57</sup>   |
| Presenteeism (any*)                               | <b>40 (69)</b>      | <b>20 (91)</b> <sup>3,11,12,14,17,18,24,27–30,39,42–44,50,51,53,56,58</sup>        | <b>20 (56)</b> <sup>2,4–6,8,10,13,19,23,25,26,33,34,41,45,46,48,49,52,57</sup>            |

**OBS** – Observational studies; **RCT** – randomized controlled trials. \*All studies that assessed this specific domain (alone and/or in combination with other work outcome domains).

**Online Supplementary Table S3 – Included studies in inflammatory arthritis (Search 1) by frequency of assessment for each work outcome domain and by time horizon**

|                                                     | <b>RCT</b>                                                | <b>OBS</b>                                                                      |
|-----------------------------------------------------|-----------------------------------------------------------|---------------------------------------------------------------------------------|
|                                                     | <b>n (%)</b>                                              | <b>n (%)</b>                                                                    |
| <b>Frequency of assessment (work status, n=17)</b>  | <b>N=5</b>                                                | <b>N=12</b>                                                                     |
| 1 to 12 weeks                                       | <b>1 (20)</b> <sup>43</sup>                               | <b>1 (8)</b> <sup>22</sup>                                                      |
| 13 to 24 weeks                                      | <b>0 (0)</b>                                              | <b>2 (17)</b> <sup>5,33</sup>                                                   |
| > 24 weeks                                          | <b>0 (0)</b>                                              | <b>2 (17)</b> <sup>31,41</sup>                                                  |
| Variable <sup>1</sup>                               | <b>4 (24)</b> <sup>14,28,42,50</sup>                      | <b>2 (17)</b> <sup>7,32</sup>                                                   |
| Registry derived¶                                   | <b>0 (0)</b>                                              | <b>5 (42)</b> <sup>1,16,21,35,47</sup>                                          |
| <b>Frequency of assessment (sick leave, n=46)</b>   | <b>N=18</b>                                               | <b>N=28</b>                                                                     |
| 1 to 12 weeks                                       | <b>7 (39)</b> <sup>12,24,29,40,43,44,56</sup>             | <b>8 (29)</b> <sup>8,10,23,34,45,46,48,57</sup>                                 |
| 13 to 24 weeks                                      | <b>0 (0)</b>                                              | <b>4 (14)</b> <sup>5,13,33,49</sup>                                             |
| > 24 weeks                                          | <b>2 (11)</b> <sup>15,58</sup>                            | <b>6 (21)</b> <sup>4,19,25,26,41,52</sup>                                       |
| Variable <sup>1</sup>                               | <b>9 (50)</b> <sup>11,14,17,18,27,28,30,42,51</sup>       | <b>2 (7)</b> <sup>9,55</sup>                                                    |
| Registry derived¶                                   | <b>0 (0)</b>                                              | <b>8 (29)</b> <sup>1,20,21,35–38,54</sup>                                       |
| <b>Frequency of assessment (presenteeism, n=40)</b> | <b>N=20</b>                                               | <b>N=20</b>                                                                     |
| 1 to 12 weeks                                       | <b>7 (35)</b> <sup>12,24,29,39,43,44,56</sup>             | <b>8 (40)</b> <sup>8,10,23,34,45,46,48,57</sup>                                 |
| 13 to 24 weeks                                      | <b>1 (5)</b> <sup>53</sup>                                | <b>4 (20)</b> <sup>5,13,33,49</sup>                                             |
| > 24 weeks                                          | <b>1 (5)</b> <sup>58</sup>                                | <b>7 (35)</b> <sup>4,6,19,25,26,41,52,58</sup>                                  |
| Variable <sup>1</sup>                               | <b>11 (55)</b> <sup>3,11,14,17,18,27,28,30,42,50,51</sup> | <b>1 (5)</b> <sup>2</sup>                                                       |
| <b>Time horizon (all studies, n=58)</b>             | <b>N=22</b>                                               | <b>N=36</b>                                                                     |
| ≤ 6 months                                          | <b>10 (45)*</b> <sup>3,12,14,24,27,29,39,42,44,56</sup>   | <b>4 (11)</b> <sup>8,23,34,48</sup>                                             |
| > 6-12 months                                       | <b>5 (23)*</b> <sup>11,14,28,30,53</sup>                  | <b>9 (25)</b> <sup>6,13,22,33,41,45,46,52,57</sup>                              |
| > 12 months                                         | <b>8 (36)</b> <sup>15,17,18,40,43,50,51,58</sup>          | <b>23 (64)</b> <sup>1,2,4,5,7,9,10,16,19–21,25,26,31,32,35–38,47,49,54,55</sup> |

**OBS** – Observational studies; **RCT** – randomized controlled trials.

<sup>1</sup> e.g. every 24 weeks in the first year of follow-up and yearly thereafter.

\*Emery et al., 2016 has two different time horizons because this is a post hoc analysis of two trials: time horizon of 26 and 24 weeks for the Optimal Protocol for Treatment Initiation with Methotrexate and Adalimumab (OPTIMA) and PRevention Of Work Disability (PROWD) trials, respectively.

¶ Registry studies that assessed sick-leave days in social-security databases.

**Online Supplementary Table S4.** Characteristics of included systematic literature reviews of studies with work participation as an outcome domain in patients with other chronic diseases (Search 2, n=24)

| Author, Year <sup>Ref</sup>    | Disease | Work outcome domain <sup>§</sup>                                                                                                              | Databases searched                                                                                                                                                                                                                                                                                                                                                                                                                                                                                                                                                                                                                                      | N included studies | Search timeframe                         | Meta-analysis |
|--------------------------------|---------|-----------------------------------------------------------------------------------------------------------------------------------------------|---------------------------------------------------------------------------------------------------------------------------------------------------------------------------------------------------------------------------------------------------------------------------------------------------------------------------------------------------------------------------------------------------------------------------------------------------------------------------------------------------------------------------------------------------------------------------------------------------------------------------------------------------------|--------------------|------------------------------------------|---------------|
| Ashley KD, 2019 <sup>59</sup>  | Stroke  | Return to work                                                                                                                                | PubMed, CINAHL, and Scopus                                                                                                                                                                                                                                                                                                                                                                                                                                                                                                                                                                                                                              | 19                 | 2009-2018                                | No            |
| Bijker R, 2018 <sup>60</sup>   | Cancer  | Any <sup>#</sup>                                                                                                                              | Pub-Med, EMBASE, PsycINFO, CINAHL, and the Cochrane Library                                                                                                                                                                                                                                                                                                                                                                                                                                                                                                                                                                                             | 20                 | 2000-2016                                | No            |
| Bilodeau K, 2017 <sup>61</sup> | Cancer  | Return to work                                                                                                                                | Scopus, CINAHL, MEDLINE, Social Work Abstract, and PsycINFO                                                                                                                                                                                                                                                                                                                                                                                                                                                                                                                                                                                             | 17                 | 2005-2015                                | No            |
| Büsch K, 2014 <sup>62</sup>    | IBD     | Employment status, work capacity, sick leave, disability pension, early retirement, overall activity impairment* and overall work impairment* | PubMed MEDLINE and EMBASE                                                                                                                                                                                                                                                                                                                                                                                                                                                                                                                                                                                                                               | 45                 | up to June 2011 and updated in June 2013 | No            |
| Chow SL, 2014 <sup>63</sup>    | Cancer  | Return to work                                                                                                                                | MEDLINE, EMBASE, ProQuest, PubMed and ScienceDirect                                                                                                                                                                                                                                                                                                                                                                                                                                                                                                                                                                                                     | 27                 | 1990-2013                                | No            |
| Dujits SFA, 2014 <sup>64</sup> | Cancer  | Return to work                                                                                                                                | MEDLINE, PsycINFO, EMBASE, and CINAHL                                                                                                                                                                                                                                                                                                                                                                                                                                                                                                                                                                                                                   | 30                 | 2000-2013                                | No            |
| Edwards JD, 2017 <sup>65</sup> | Stroke  | Return to work                                                                                                                                | MEDLINE and EMBASE                                                                                                                                                                                                                                                                                                                                                                                                                                                                                                                                                                                                                                      | 29                 | up to May 2016                           | No            |
| Fong CJ, 2015 <sup>66</sup>    | Cancer  | Employment status and/or related outcomes (i.e. time out-of-work)                                                                             | Academic One File, Academic Search Complete, Academic Source Complete, Business Source Complete, CINAHL Plus with Full Text, CIRRIE, Cochrane Central Registry of Controlled Trials, Ed Line and Electronic Texts in Education and Training, Education Full Text, ERIC, Professional Development Collection, ProQuest, ProQuest Dissertations & Theses, PsycINFO, Psychology and Behavioral Sciences Collection, PubMed, Science and Technology Collection, Sociological Abstracts, Web of Science, The Campbell Collaboration, World Cat [for monographs], MEDLINE, EMBASE, OSH-ROM, DARE, ClinicalTrials.gov, Trialregister.nl, Controlled-trials.com | 12                 | 1973-2013                                | Yes           |
| Kamal KM, 2017 <sup>67</sup>   | Cancer  | Work productivity                                                                                                                             | MEDLINE, Cochrane, Scopus, and CINAHL                                                                                                                                                                                                                                                                                                                                                                                                                                                                                                                                                                                                                   | 62                 | up to January 2016                       | No            |
| McLennan V, 2019 <sup>68</sup> | Cancer  | Return to work                                                                                                                                | MEDLINE, EMBASE, Scopus, Cochrane Library, CINAHL and PsycINFO                                                                                                                                                                                                                                                                                                                                                                                                                                                                                                                                                                                          | 47                 | up to March 2018                         | No            |

| Author, Year <sup>Ref</sup>       | Disease  | Work outcome domain <sup>§</sup>         | Databases searched                                                                                                                    | N included studies | Search timeframe       | Meta-analysis |
|-----------------------------------|----------|------------------------------------------|---------------------------------------------------------------------------------------------------------------------------------------|--------------------|------------------------|---------------|
| McQueen J, 2016 <sup>69</sup>     | Cancer   | Return to work                           | MEDLINE, EMBASE, CINAHL, PsycINFO; Clinical Trials.gov, Trial register.nl, and controlled.trials.com.                                 | 3                  | up to June 2015        | Yes           |
| Miller PSJ, 2016 <sup>70</sup>    | Nocturia | Work productivity                        | MEDLINE (PubMed), EMBASE, EconLit, Cochrane Database of Systematic Reviews, the American College of Physicians Journal Club, and DARE | 83                 | end date not specified | No            |
| Paltrinieri S, 2018 <sup>71</sup> | Cancer   | Return to work                           | MEDLINE, CINAHL, EMBASE, PsycINFO, and the Cochrane Library (all databases)                                                           | 12                 | 2010-2018              | No            |
| Patel JG, 2014 <sup>72</sup>      | COPD     | Work productivity and indirect costs     | Medline, Scopus, and OvidSP                                                                                                           | 11                 | 2000-2012              | No            |
| Rai KK, 2018 <sup>73</sup>        | Cancer   | Employment, absenteeism and presenteeism | CINAHL, EMBASE, MEDLINE and the Cochrane Library databases                                                                            | 44                 | 1973-2017              | No            |
| Sharples AJ, 2017 <sup>74</sup>   | Obesity  | Any <sup>#</sup>                         | MEDLINE, EMBASE, The Cochrane Library and NHS Evidence                                                                                | 10                 | up to November 2015    | Yes           |
| Soejima T, 2016 <sup>75</sup>     | Cancer   | Work performance                         | MEDLINE, CINAHL and PsycINFO                                                                                                          | 26                 | up to March 2015       | No            |
| Stone DS, 2017 <sup>76</sup>      | Cancer   | Any <sup>#</sup>                         | PubMed, CINAHL, and PsycINFO                                                                                                          | 23                 | up to January 2016     | No            |
| Sun Y, 2017 <sup>77</sup>         | Cancer   | Return to work                           | CINAHL, MEDLINE, SCOPUS, and PubMed                                                                                                   | 25                 | 2004-2014              | No            |
| Tavan H, 2019 <sup>78</sup>       | Cancer   | Return to work                           | PubMed, Scopus, SID, Google, Elsevier, Google Scholar, and Web of Sciences                                                            | 7                  | 2007-2017              | Yes           |
| Vayr F, 2018 <sup>79</sup>        | Obesity  | Return to work                           | PubMed and Web of Science                                                                                                             | 18                 | 2000-2017              | No            |
| Vayr F, 2019 <sup>80</sup>        | Cancer   | Employment status                        | MEDLINE                                                                                                                               | 23                 | 2000-2018              | No            |
| Wang L, 2018 <sup>81</sup>        | Cancer   | Employment status                        | MEDLINE, EMBASE, CINAHL, and PsycINFO                                                                                                 | 24                 | up to March 2017       | Yes           |
| Wei XJ, 2016 <sup>82</sup>        | Stroke   | Return to work                           | MEDLINE, CINAHL and PubMed                                                                                                            | 10                 | 2004-2014              | No            |

§As defined by Authors; #Not restricted, not specified upfront; \*As measured with the Work Productivity and Activity Impairment: Crohn's Disease (WPAI:CD).

**CINAHL** – Cumulative Index of Nursing and Allied Health Literature; **CIRRIE** – Center for International Rehabilitation Research Information and Exchange Database; **COPD** – chronic obstructive pulmonary diseases; **DARE** – Database of Abstracts of Reviews of Effects; **ERIC** – Education Resources Information Center; **IBD** – inflammatory bowel diseases; **OSH-ROM** – Occupational Safety and Health.

## References

1. Alemao, E. *et al.* Association of anti-cyclic citrullinated protein antibodies, erosions, and rheumatoid factor with disease activity and work productivity: A patient registry study. *Semin. Arthritis Rheum.* **47**, 630–638 (2018).
2. Barnabe, C. *et al.* Heterogeneous disease trajectories explain variable radiographic, function and quality of life outcomes in the Canadian Early Arthritis Cohort (CATCH). *PLoS One* **10**, e0135327 (2015).
3. Bingham, C. O. 3rd *et al.* The effect of intravenous golimumab on health-related quality of life in rheumatoid arthritis: 24-week results of the phase III GO-FURTHER trial. *J. Rheumatol.* **41**, 1067–1076 (2014).
4. Boer, A. C., Boonen, A. & van der Helm van Mil, A. H. M. Is Anti-Citrullinated Protein Antibody-Positive Rheumatoid Arthritis Still a More Severe Disease Than Anti-Citrullinated Protein Antibody-Negative Rheumatoid Arthritis? A Longitudinal Cohort Study in Rheumatoid Arthritis Patients Diagnosed From 2000 Onwar. *Arthritis Care Res.* **70**, 987–996 (2018).
5. Boonen, A., Boone, C., Albert, A. & Mielants, H. Contextual factors influence work outcomes in employed patients with ankylosing spondylitis starting etanercept: 2-year results from AS@Work. *Rheumatology (Oxford)*. **57**, 791–797 (2018).
6. Boot, C. R. L. *et al.* One-year Predictors of Presenteeism in Workers with Rheumatoid Arthritis: Disease-related Factors and Characteristics of General Health and Work. *J. Rheumatol.* **45**, 766–770 (2018).
7. Castillo-Ortiz, J. D. *et al.* Work Outcome in Patients with Ankylosing Spondylitis: Results from a 12-Year Followup of an International Study. *Arthritis Care Res.* **68**, 544–552 (2016).
8. Claudepierre, P. *et al.* Treatment with golimumab or infliximab reduces health resource utilization and increases work productivity in patients with ankylosing spondylitis in the QUO-VADIS study, a large, prospective real-life cohort. *Int. J. Rheum. Dis.* **22**, 995–1001 (2019).
9. Combe, B. *et al.* Comparison of the long-term outcome for patients with rheumatoid arthritis with persistent moderate disease activity or disease remission during the first year after diagnosis: Data from the ESPOIR cohort. *Ann. Rheum. Dis.* **74**, 724–729 (2015).
10. Cooksey, R. *et al.* Severe flare as a predictor of poor outcome in ankylosing spondylitis: A cohort study using questionnaire and routine data linkage. *Rheumatol. (United Kingdom)* **54**, 1563–1572 (2015).
11. Deodhar, A. A. *et al.* Effect of Secukinumab on Patient-Reported Outcomes in Patients With Active Ankylosing Spondylitis: A Phase III Randomized Trial (MEASURE 1). *Arthritis Rheumatol. (Hoboken, N.J.)* **68**, 2901–2910 (2016).
12. Dougados, M. *et al.* Evaluation of health outcomes with etanercept treatment in patients with early nonradiographic axial spondyloarthritis. *J. Rheumatol.* **42**, 1835–1841 (2015).
13. Druce, K. L. *et al.* Fatigue independently predicts different work disability dimensions in etanercept-treated rheumatoid arthritis and ankylosing spondylitis patients. *Arthritis Res. Ther.* **20**, 1–9 (2018).
14. Emery, P. *et al.* Effect of adalimumab on the work-related outcomes scores in patients with early rheumatoid arthritis receiving methotrexate. *Rheumatol. (United Kingdom)* **55**, 1458–1465 (2016).
15. Eriksson, J. K. *et al.* Infliximab Versus Conventional Combination Treatment and Seven-Year Work Loss in Early Rheumatoid Arthritis: Results of a Randomized Swedish Trial. *Arthritis Care Res.* **68**, 1758–1766 (2016).

16. Espersen, R., Jensen, V., Berg Johansen, M. & Fonager, K. The Impact of Diagnosis on Job Retention: A Danish Registry-Based Cohort Study. *Rehabil. Res. Pract.* **2015**, 795980 (2015).
17. Fleischmann, R. *et al.* Patient-Reported Outcomes From a Two-Year Head-to-Head Comparison of Subcutaneous Abatacept and Adalimumab for Rheumatoid Arthritis. *Arthritis Care Res.* **68**, 907–913 (2016).
18. Gottlieb, A. B. *et al.* Ixekizumab improves patient-reported outcomes up to 52 weeks in bDMARD-naïve patients with active psoriatic arthritis (SPIRIT-P1). *Rheumatol. (United Kingdom)* **57**, 1777–1788 (2018).
19. Haglund, E., Petersson, I. F., Bremander, A. & Bergman, S. Predictors of Presenteeism and Activity Impairment Outside Work in Patients with Spondyloarthritis. *J. Occup. Rehabil.* **25**, 288–295 (2015).
20. Hansen, S. M. *et al.* Effect of rheumatoid arthritis on longterm sickness absence in 1994-2011: A danish cohort study. *J. Rheumatol.* **43**, 707–715 (2016).
21. Hansen, S. M. *et al.* Work ability in rheumatoid arthritis patients: A register study on the prospective risk of exclusion and probability of returning to work. *Rheumatol. (United Kingdom)* **56**, 1135–1143 (2017).
22. He, C. *et al.* The effect of total hip replacement on employment in patients with ankylosing spondylitis. *Clin. Rheumatol.* **35**, 2975–2981 (2016).
23. Hussain, W. *et al.* Effect of Adalimumab on Work Ability Assessed in Rheumatoid Arthritis Disease Patients in Saudi Arabia (AWARDS). *Open Rheumatol. J.* **9**, 46–50 (2015).
24. Kaeley, G. S. *et al.* Similar Improvements in Patient-Reported Outcomes Among Rheumatoid Arthritis Patients Treated with Two Different Doses of Methotrexate in Combination with Adalimumab: Results From the MUSICA Trial. *Rheumatol. Ther.* **5**, 123–134 (2018).
25. Karpouzas, G. A. *et al.* Discordant patient-physician assessments of disease activity and its persistence adversely impact quality of life and work productivity in US Hispanics with rheumatoid arthritis. *RMD Open* **3**, 1–9 (2017).
26. Karpouzas, G. A., Strand, V. & Ormseth, S. R. Latent profile analysis approach to the relationship between patient and physician global assessments of rheumatoid arthritis activity. *RMD Open* **4**, 1–10 (2018).
27. Kavanaugh, A., Gladman, D., van der Heijde, D., Purcaru, O. & Mease, P. Improvements in productivity at paid work and within the household, and increased participation in daily activities after 24 weeks of certolizumab pegol treatment of patients with psoriatic arthritis: results of a phase 3 double-blind randomised placebo-controlled study. *Ann. Rheum. Dis.* **74**, 44–51 (2015).
28. Keystone, E. C. *et al.* Patient-reported outcomes from a phase 3 study of baricitinib versus placebo or adalimumab in rheumatoid arthritis: Secondary analyses from the RA-BEAM study. *Ann. Rheum. Dis.* **76**, 1853–1861 (2017).
29. Machado, D. A. *et al.* Open-label observation of addition of etanercept versus a conventional disease-modifying antirheumatic drug in subjects with active rheumatoid arthritis despite methotrexate therapy in the latin american region. *J. Clin. Rheumatol.* **20**, 25–33 (2014).
30. Maksymowych, W. P. *et al.* Clinical and MRI responses to etanercept in early non-radiographic axial spondyloarthritis: 48-week results from the EMBARK study. *Ann. Rheum. Dis.* **75**, 1328–1335 (2016).
31. Manders, S. H. M. M. *et al.* Determinants associated with work participation in patients with established rheumatoid arthritis taking tumor necrosis factor inhibitors. *J. Rheumatol.* **41**, 1263–1269 (2014).
32. McWilliams, D. F., Varughese, S., Young, A., Kiely, P. D. & Walsh, D. A. Work disability and



- state benefit claims in early rheumatoid arthritis: The ERAN cohort. *Rheumatol. (United Kingdom)* **53**, 473–481 (2014).
33. Muñoz-Fernández, S. *et al.* Evaluation of the impact of nursing clinics in the rheumatology services. *Rheumatol. Int.* **36**, 1309–1317 (2016).
  34. Nakagawa, H. *et al.* Real-World Postmarketing Study of the Impact of Adalimumab Treatment on Work Productivity and Activity Impairment in Patients with Psoriatic Arthritis. *Adv. Ther.* **36**, 691–707 (2019).
  35. Olofsson, T. *et al.* Predictors of work disability during the first 3 years after diagnosis in a national rheumatoid arthritis inception cohort. *Ann. Rheum. Dis.* **73**, 845–853 (2014).
  36. Olofsson, T. *et al.* Does disease activity at start of biologic therapy influence work-loss in RA patients? *Rheumatol. (United Kingdom)* **55**, 729–734 (2016).
  37. Olofsson, T. *et al.* Predictors of work disability after start of anti-TNF therapy in a national cohort of Swedish patients with rheumatoid arthritis: Does early anti-TNF therapy bring patients back to work? *Ann. Rheum. Dis.* **76**, 1245–1252 (2017).
  38. Olofsson, T., Söderling, J. K., Gülfe, A., Kristensen, L.-E. E. & Wallman, J. K. Patient-Reported Outcomes Are More Important Than Objective Inflammatory Markers for Sick Leave in Biologics-Treated Patients With Rheumatoid Arthritis. *Arthritis Care Res.* **70**, 1712–1716 (2018).
  39. Rahman, P. *et al.* Ustekinumab Treatment and Improvement of Physical Function and Health-Related Quality of Life in Patients With Psoriatic Arthritis. *Arthritis Care Res.* **68**, 1812–1822 (2016).
  40. Rendas-Baum, R. *et al.* Estimated medical expenditure and risk of job loss among rheumatoid arthritis patients undergoing tofacitinib treatment: Post hoc analyses of two randomized clinical trials. *Rheumatol. (United Kingdom)* **56**, 1386–1394 (2017).
  41. Shim, J., Jones, G. T., Pathan, E. M. I. & Macfarlane, G. J. Impact of biological therapy on work outcomes in patients with axial spondyloarthritis: results from the British Society for Rheumatology Biologics Register (BSRBR-AS) and meta-analysis. *Ann. Rheum. Dis.* **77**, 1578–1584 (2018).
  42. Smolen, J. S. *et al.* Patient-reported outcomes from a randomised phase III study of baricitinib in patients with rheumatoid arthritis and an inadequate response to biological agents (RA-BEACON). *Ann. Rheum. Dis.* **76**, 694–700 (2017).
  43. Strand V *et al.* The impact of rheumatoid arthritis on work and predictors of overall work impairment from three therapeutic scenarios. *Int. J. Clin. Rheumatol.* **10**, 317–328 (2015).
  44. Strand, V. *et al.* Patient-reported outcomes from a randomized phase III trial of sarilumab monotherapy versus adalimumab monotherapy in patients with rheumatoid arthritis. *Arthritis Res. Ther.* **20**, 129 (2018).
  45. Szántó, S. *et al.* Improved clinical, functional and work outcomes in spondyloarthritis during real-life adalimumab treatment in central-eastern Europe. *J. Comp. Eff. Res.* **5**, 475–485 (2016).
  46. Takeuchi, T. *et al.* Impact of Adalimumab on Work Productivity and Activity Impairment in Japanese Patients with Rheumatoid Arthritis: Large-Scale, Prospective, Single-Cohort ANOUVEAU Study. *Adv. Ther.* **34**, 686–702 (2017).
  47. Tiippana-Kinnunen, T. *et al.* Work disability in Finnish patients with rheumatoid arthritis: A 15-year follow-up. *Clin. Exp. Rheumatol.* **32**, 88–94 (2014).
  48. Tillett, W. *et al.* Effect of anti-TNF and conventional synthetic disease-modifying anti-rheumatic drug treatment on work disability and clinical outcome in a multicentre observational cohort study of psoriatic arthritis. *Rheumatol. (United Kingdom)* **56**, 603–612 (2017).

49. Tran-Duy, A. *et al.* Longitudinal analyses of presenteeism and its role as a predictor of sick leave in patients with ankylosing spondylitis. *Arthritis Care Res.* **67**, 1578–1585 (2015).
50. van der Heijde, D. D. *et al.* The Effect of golimumab therapy on disease activity and health-related quality of life in patients with ankylosing spondylitis: 2-year results of the GO-RAISE trial. *J. Rheumatol.* **41**, 1095–1103 (2014).
51. van der Heijde, D. D., Braun, J. J., Rudwaleit, M., Purcaru, O. & Kavanaugh, A. F. Improvements in workplace and household productivity with certolizumab pegol treatment in axial spondyloarthritis: results to week 96 of a phase III study. *RMD Open* **4**, e000659 (2018).
52. van Lunteren, M. *et al.* Disease activity decrease is associated with improvement in work productivity over 1 year in early axial spondyloarthritis (SPondyloArthritis Caught Early cohort). *Rheumatol. (United Kingdom)* **56**, 2222–2228 (2017).
53. van Vilsteren, M. *et al.* Effectiveness of an integrated care intervention on supervisor support and work functioning of workers with rheumatoid arthritis. *Disabil. Rehabil.* **39**, 354–362 (2017).
54. Wallman, J. K. *et al.* Work disability in non-radiographic axial spondyloarthritis patients before and after start of anti-TNF therapy: a population-based regional cohort study from southern Sweden. *Rheumatol. (United Kingdom)* **56**, 716–724 (2017).
55. Webers, C. *et al.* Sick leave and its predictors in ankylosing spondylitis: long-term results from the Outcome in Ankylosing Spondylitis International Study. *RMD open* **4**, e000766 (2018).
56. Wei, J. C.-C. C., Tsai, W.-C. C., Citera, G., Kotak, S. & Llamado, L. Efficacy and safety of etanercept in patients from Latin America, Central Europe and Asia with early non-radiographic axial spondyloarthritis. *Int. J. Rheum. Dis.* **21**, 1443–1451 (2018).
57. Westhovens, R. *et al.* Improvements in productivity and increased participation in daily activities over 52 weeks of certolizumab pegol treatment of rheumatoid arthritis: results of a Belgian observational study. *Acta Clin. Belgica Int. J. Clin. Lab. Med.* **74**, 342–350 (2019).
58. Wiland, P. *et al.* The effect of reduced or withdrawn etanercept-methotrexate therapy on patient-reported outcomes in patients with early rheumatoid arthritis. *J. Rheumatol.* **43**, 1268–1277 (2016).
59. Ashley, K. D., Lee, L. T. & Heaton, K. Return to Work Among Stroke Survivors. *Work. Heal. Saf.* **67**, 87–94 (2019).
60. Bijker, R. *et al.* Functional Impairments and Work-Related Outcomes in Breast Cancer Survivors: A Systematic Review. *J. Occup. Rehabil.* **28**, 429–451 (2018).
61. Bilodeau, K., Tremblay, D. & Durand, M. J. Exploration of return-to-work interventions for breast cancer patients: a scoping review. *Support. Care Cancer* **25**, 1993–2007 (2017).
62. Büsch, K. *et al.* Sick leave and disability pension in inflammatory bowel disease: A systematic review. *J. Crohn's Colitis* **8**, 1362–1377 (2014).
63. Chow, S. L., Ting, A. S. & Su, T. T. Development of conceptual framework to understand factors associated with return to work among cancer survivors: A systematic review. *Iran. J. Public Health* **43**, 391–405 (2014).
64. Duijts, S. F. A. *et al.* Physical and psychosocial problems in cancer survivors beyond return to work: A systematic review. *Psychooncology.* **23**, 481–492 (2014).
65. Edwards, J. D., Kapoor, A., Linkewich, E. & Swartz, R. H. Return to work after young stroke: A systematic review. *Int. J. Stroke* **13**, 243–256 (2018).
66. Fong, C. J., Murphy, K. M., Westbrook, J. D. & Markle, M. M. Behavioral, Psychological, Educational, and Vocational Interventions to Facilitate Employment Outcomes for Cancer Survivors: A Systematic Review. *Campbell Syst. Rev.* **11**, 1–81 (2015).

67. Kamal, K. M. *et al.* A systematic review of the effect of cancer treatment on work productivity of patients and caregivers. *J. Manag. Care Spec. Pharm.* **23**, 136–162 (2017).
68. McLennan, V., Ludvik, D., Chambers, S. & Frydenberg, M. Work after prostate cancer: a systematic review. *J. Cancer Surviv.* 282–291 (2019). doi:10.1007/s11764-019-00750-4
69. McQueen, J. & McFeely, G. Case management for return to work for individuals living with cancer: A systematic review. *Int. J. Ther. Rehabil.* **24**, 203–210 (2017).
70. Miller, P. S. J., Hill, H. & Andersson, F. L. Nocturia Work Productivity and Activity Impairment Compared with Other Common Chronic Diseases. *Pharmacoeconomics* **34**, 1277–1297 (2016).
71. Paltrinieri, S. *et al.* Return to work in European Cancer survivors: a systematic review. *Support. Care Cancer* **26**, 2983–2994 (2018).
72. Patel, J. G., Nagar, S. P. & Dalal, A. A. Indirect costs in chronic obstructive pulmonary disease: A review of the economic burden on employers and individuals in the United States. *Int. J. COPD* **9**, 289–300 (2014).
73. Rai, K. K., Adab, P., Ayres, J. G. & Jordan, R. E. Systematic review: Chronic obstructive pulmonary disease and work-related outcomes. *Occup. Med. (Chic. Ill)*. **68**, 99–108 (2018).
74. Sharples, A. J. & Cheruvu, C. V. N. Systematic Review and Meta-Analysis of Occupational Outcomes after Bariatric Surgery. *Obes. Surg.* **27**, 774–781 (2017).
75. Soejima, T. & Kamibeppu, K. Are cancer survivors well-performing workers? A systematic review. *Asia. Pac. J. Clin. Oncol.* **12**, e383–e397 (2016).
76. Stone, D. S., Ganz, P. A., Pavlish, C. & Robbins, W. A. Young adult cancer survivors and work: a systematic review. *J. Cancer Surviv.* **11**, 765–781 (2017).
77. Sun, Y., Shigaki, C. L. & Armer, J. M. Return to work among breast cancer survivors: A literature review. *Support. Care Cancer* **25**, 709–718 (2017).
78. Tavan, H., Azadi, A. & Veisani, Y. Return to Work in Cancer Patients: A Systematic Review and Meta-analysis. *Indian J. Palliat. Care* **25**, 147–152 (2019).
79. Vayr, F. *et al.* The Impact of Bariatric Surgery on Employment: A Systematic Review. *Bariatric Surg. Pract. Patient Care* **13**, 54–63 (2018).
80. Vayr, F. *et al.* Lung cancer survivors and employment: A systematic review. *Lung Cancer* **131**, 31–39 (2019).
81. Wang, L. *et al.* Predictors of unemployment after breast cancer surgery: A systematic review and meta-analysis of observational studies. *J. Clin. Oncol.* **36**, 1868–1879 (2018).
82. Wei, X. J., Liu, X. F. & Fong, K. N. K. Outcomes of return-to-work after stroke rehabilitation: A systematic review. *Br. J. Occup. Ther.* **79**, 299–308 (2016).
